# Supplementary material for: Risk Factors for the Development of Nontuberculous Mycobacteria Pulmonary Disease during Long-Term Follow-Up after Lung Cancer Surgery
Source: MDPI journal article supplement (doi:10.3390/diagnostics12051086), 2022-04-27
Supplement: s1 [file s1]

**Table S1.** The baseline characteristics of patients with NSCLC and the development of NTM-positive results after lung resection

| Variables                    | NTM-positive*         |                      |                    |
|------------------------------|-----------------------|----------------------|--------------------|
|                              | NTM (–)<br>(n = 6347) | NTM (+)<br>(n = 156) | P                  |
| Age, years                   | 63 (56–69)            | 65 (59–70)           | 0.007              |
| Age > 65 years               | 2703 (42.6)           | 84 (53.8)            | 0.005              |
| Sex, male                    | 3864 (60.9)           | 115 (73.7)           | 0.001              |
| Smoking status (n = 6501)    |                       |                      | 0.002              |
| Never smoker                 | 2703 (42.6)           | 46 (29.5)            |                    |
| Ex-smoker                    | 1986 (31.3)           | 54 (34.6)            |                    |
| Current smoker               | 1656 (26.1)           | 56 (35.9)            |                    |
| Pack-years (n = 3761)        | 30 (20–45)            | 40 (30–52)           | 0.001              |
| BMI, kg/m <sup>2</sup>       | 23.9 (22.0–25.8)      | 23.3 (20.9–25.1)     | <0.001             |
| BMI ≤ 18.5kg/ m <sup>2</sup> | 163 (2.6)             | 10 (6.4)             | 0.008              |
| Comorbidity                  |                       |                      |                    |
| Pulmonary disease            |                       |                      |                    |
| History of pulmonary TB      | 666 (10.5)            | 35 (22.4)            | <0.001             |
| COPD/Asthma                  | 1697 (26.7)           | 62 (39.7)            | <0.001             |
| Interstitial lung disease    | 70 (1.1)              | 4 (2.6)              | 0.101              |
| DM                           | 998 (15.7)            | 23 (14.7)            | 0.739              |
| Hypertension                 | 2300 (36.2)           | 63 (40.4)            | 0.287              |
| Chronic heart disease        | 441 (6.9)             | 10 (6.4)             | 0.794              |
| Chronic renal disease        | 88 (1.4)              | 1 (0.6)              | 0.726              |
| Cerebrovascular disease      | 372 (5.9)             | 3 (1.9)              | 0.037              |
| Previous malignancy          | 877 (13.8)            | 22 (14.1)            | 0.919              |
| Clinical stage at diagnosis  |                       |                      | 0.001 <sup>‡</sup> |
| Stage I                      | 4395 (69.2)           | 92 (59.0)            |                    |
| Stage II                     | 1101 (17.3)           | 28 (17.9)            |                    |
| Stage III                    | 791 (12.5)            | 35 (22.4)            |                    |
| Stage IV                     | 60 (0.9)              | 1 (0.6)              |                    |
| Tumor histology              |                       |                      | 0.046              |
| Adenocarcinoma               | 4505 (71.0)           | 97 (62.2)            |                    |
| Squamous cell carcinoma      | 1464 (23.1)           | 45 (28.8)            |                    |
| Others <sup>‡</sup>          | 378 (6.0)             | 14 (9.0)             |                    |
| Location of lung cancer      |                       |                      | 0.115              |
| Right                        | 3668 (57.8)           | 100 (64.1)           |                    |
| Left                         | 2679 (42.2)           | 56 (35.9)            |                    |
| CT findings                  |                       |                      |                    |
| TB sequelae                  | 266 (4.2)             | 11 (7.1)             | 0.081              |
| Bronchiectasis               | 378 (6.0)             | 24 (15.4)            | <0.001             |
| Centrilobular bronchiolitis  | 137 (2.2)             | 19 (12.2)            | <0.001             |

Data are presented as n (%) or the median (interquartile range). NSCLC, non-small cell lung cancer; NTM, nontuberculous mycobacteria; BMI, body mass index; TB, tuberculosis; COPD, chronic obstructive pulmonary disease; DM, diabetes mellitus. \*The sum of confirmed and suspected patients with NTM-PD. <sup>‡</sup>P values were calculated with the use of a Mantel-Haenszel test (trend test). <sup>‡</sup>Includes large cell neuroendocrine carcinoma, adenosquamous carcinoma, pleomorphic carcinoma, adenoid cystic carcinoma, mucoepidermoid carcinoma, epithelial myoepithelial carcinoma, and carcinoid tumor.

**Table S2.** The treatment profile for NSCLC and the development of NTM-positive results after lung resection

| Variables                       | NTM-positive*         |                      |                    |
|---------------------------------|-----------------------|----------------------|--------------------|
|                                 | NTM (-)<br>(n = 6347) | NTM (+)<br>(n = 156) | P                  |
| Neoadjuvant treatment           |                       |                      |                    |
| No                              | 5752 (90.6)           | 127 (81.4)           | <0.001             |
| Yes                             | 595 (9.4)             | 29 (18.6)            |                    |
| CCRT                            | 515 (8.1)             | 26 (16.7)            | <0.001             |
| Chemotherapy                    | 74 (1.2)              | 2 (1.3)              |                    |
| Radiotherapy                    | 6 (0.1)               | 1 (0.6)              |                    |
| Surgical approach               |                       |                      | <0.001             |
| VATS                            | 3982 (62.7)           | 72 (46.2)            | 0.553 <sup>‡</sup> |
| Thoracotomy                     | 2365 (37.3)           | 84 (53.8)            |                    |
| Extent of surgical resection    |                       |                      |                    |
| Sublobar resection              | 1070 (16.8)           | 18 (11.5)            | 0.805              |
| Wedge resection                 | 623 (9.8)             | 11 (7.0)             |                    |
| Segmentectomy                   | 447 (7.0)             | 7 (4.5)              |                    |
| Lobectomy                       | 4817 (75.9)           | 124 (79.5)           | 0.088 <sup>‡</sup> |
| Bilobectomy                     | 238 (3.7)             | 11 (7.1)             |                    |
| Pneumonectomy                   | 222 (3.5)             | 3 (1.9)              |                    |
| Pathologic stage <sup>‡</sup>   |                       |                      |                    |
| I                               | 4054 (64.5)           | 91 (60.5)            | <0.001             |
| II                              | 1181 (18.8)           | 24 (15.8)            |                    |
| III                             | 981 (15.6)            | 34 (22.4)            |                    |
| IV                              | 73 (1.2)              | 2 (1.3)              |                    |
| PPC <sup>§</sup>                | 1047 (16.5)           | 51 (32.7)            | <0.001             |
| Adjuvant treatment <sup>¶</sup> |                       |                      | 0.018              |
| No                              | 4577 (72.1)           | 100 (64.1)           | 0.968              |
| Yes                             | 1722 (27.9)           | 56 (35.9)            |                    |
| CCRT                            | 321 (5.1)             | 8 (5.1)              |                    |
| Chemotherapy                    | 1108 (17.5)           | 32 (20.5)            |                    |
| Radiotherapy                    | 293 (4.6)             | 16 (10.3)            |                    |

Data are presented as n (%). NSCLC, non-small cell lung cancer; NTM, nontuberculous mycobacteria; CCRT, concurrent chemoradiotherapy; VATS, video-assisted thoracoscopic surgery; PPC, postoperative pulmonary complication. \*The sum of confirmed NTM-PD and suspicious NTM-PD patients. <sup>‡</sup>P values were calculated with the use of a Mantel-Haenszel test (trend test). <sup>‡</sup>Except for 63 patients where no re-sidual tumor appeared in the surgical specimen after neoadjuvant treatment (pathologic complete response [ypCR]). <sup>§</sup>Pneumothorax and/or prolonged air leak (n = 502), respiratory failure that required mechanical ventilation (n = 253), pneumonia (n = 231), pleural effusion (n = 150), others (atelectasis, bronchopleural fistula, pulmonary thromboembolism, etc.) (n = 291). Some patients had more than one complication. <sup>¶</sup>Excluded 48 patients due to data unavailability.

**Table S3.** Characteristics of suspicious NTM-PD

| Variables                                                                                          | n (%)     |
|----------------------------------------------------------------------------------------------------|-----------|
| <b>Suspicious NTM-PD (n = 97)</b>                                                                  |           |
| NTM culture (+) from respiratory specimen without identification test for NTM species              | 68 (70.1) |
| NTM culture (+) from only one sputum sample with identification test for NTM species               | 25 (25.8) |
| <i>M. avium</i>                                                                                    | 6 (6.2)   |
| <i>M. intracellulare</i>                                                                           | 6 (6.2)   |
| <i>M. fortuitum complex</i>                                                                        | 6 (6.2)   |
| <i>M. abscessus</i>                                                                                | 3 (3.1)   |
| Others*                                                                                            | 4 (4.1)   |
| NTM culture (+) from at least two sputum samples with only one identification test for NTM species | 4 (4.1)   |
| <i>M. avium</i>                                                                                    | 2 (2.1)   |
| <i>M. intracellulare</i>                                                                           | 1 (1.0)   |
| <i>M. massiliense</i>                                                                              | 1 (1.0)   |
| <b>Radiologic findings</b>                                                                         |           |
| Nodular bronchiectatic form                                                                        | 79 (81.4) |
| Without cavity                                                                                     | 75 (77.3) |
| With cavity                                                                                        | 4 (4.1)   |
| Fibrocavitary form                                                                                 | 18 (18.6) |

Data are presented as n (%). NTM-PD, nontuberculous mycobacteria pulmonary disease. \**M. lentiflavum*/*M. genavense* (n = 2), *M. terrae* complex (n = 1), and *M. gordonae* (n = 1). *M. lentiflavum*/*M. genavense* was reported together because the kit we used for testing could not differentiate between these two species.

**Table S4.** Prognostic factors associated with the development of NTM-positive results after lung resection for NSCLC (N = 6503)

| Variables                          | NTM-positive*             |        |                         |        |
|------------------------------------|---------------------------|--------|-------------------------|--------|
|                                    | Univariable Cox           |        | Multivariable Cox       |        |
|                                    | Unadjusted HR<br>(95% CI) | P      | Adjusted HR<br>(95% CI) | P      |
| <b>Host-related factors</b>        |                           |        |                         |        |
| Age > 65 years                     | 2.07 (1.50-2.83)          | <0.001 | 1.74 (1.26-2.41)        | 0.001  |
| Sex, male                          | 2.12 (1.49-3.04)          | <0.001 |                         |        |
| BMI ≤ 18.5 kg/m <sup>2</sup>       | 3.23 (1.70-6.13)          | <0.001 |                         |        |
| Smoking history, yes               | 2.10 (1.49-2.96)          | <0.001 | 1.48 (1.02-2.13)        | 0.037  |
| Comorbidity                        |                           |        |                         |        |
| History of pulmonary TB            | 2.55 (1.75-3.71)          | <0.001 | 2.27 (1.55-3.31)        | <0.001 |
| COPD/Asthma                        | 2.02 (1.47-2.79)          | <0.001 |                         |        |
| ILD                                | 4.90 (1.81-13.25)         | 0.002  | 4.22 (1.54-11.56)       | 0.005  |
| Diabetes mellitus                  | 1.05 (0.68-1.64)          | 0.817  |                         |        |
| History of malignancy              | 1.04 (0.66-1.63)          | 0.877  |                         |        |
| CT findings                        |                           |        |                         |        |
| TB sequelae                        | 1.80 (0.98-3.33)          | 0.060  |                         |        |
| Bronchiectasis                     | 2.67 (1.73-4.13)          | <0.001 | 2.28 (1.62-3.21)        | 0.002  |
| Centrilobular bronchiolitis        | 6.09 (3.77-9.84)          | <0.001 | 4.42 (2.65-7.39)        | <0.001 |
| <b>Cancer-related factors</b>      |                           |        |                         |        |
| Tumor histology                    |                           |        |                         |        |
| Adenocarcinoma                     | Reference                 |        |                         |        |
| Squamous cell carcinoma            | 1.83 (1.28-2.61)          | 0.001  |                         |        |
| Others <sup>‡</sup>                | 2.18 (1.24-3.81)          | 0.007  |                         |        |
| <b>Treatment-related factors</b>   |                           |        |                         |        |
| Surgical approach                  |                           |        |                         |        |
| VATS                               | Reference                 |        | Reference               |        |
| Thoracotomy                        | 2.52 (1.84-3.46)          | <0.001 | 1.53 (1.07-2.21)        | 0.021  |
| Extent of surgical resection       |                           |        |                         |        |
| Lobectomy                          | Reference                 |        |                         |        |
| Sublobar resection                 | 0.64 (0.39-1.04)          | 0.073  |                         |        |
| Bilobectomy                        | 2.09 (1.13-3.87)          | 0.019  |                         |        |
| Pneumonectomy                      | 0.75 (0.24-2.35)          | 0.617  |                         |        |
| PPC <sup>‡</sup>                   | 2.93 (2.10-4.10)          | <0.001 | 2.28 (1.62-3.21)        | <0.001 |
| Neoadjuvant and adjuvant treatment |                           |        |                         |        |
| No                                 | Reference                 |        | Reference               |        |
| CTx or RTx alone                   | 1.35 (0.89-2.04)          | 0.155  | 1.18 (0.76-1.82)        | 0.464  |
| CTx and RTx both                   | 2.40 (1.63-3.55)          | <0.001 | 2.13 (1.38-3.29)        | 0.001  |

NTM, nontuberculous mycobacteria; NSCLC, non-small cell lung cancer; HR, hazard ratio; CI, confidence interval; BMI, body mass index; TB, tuberculosis; COPD, chronic obstructive pulmonary disease; ILD, interstitial lung disease; CT, computed tomography; VATS, video-assisted thoracoscopic surgery; PPC, postoperative pulmonary complication; CTx, chemotherapy; RTx, radiotherapy. \*The sum of confirmed NTM-PD and suspicious NTM-PD patients. <sup>‡</sup>Includes large cell neuro-endocrine carcinoma, adenosquamous carcinoma, pleomorphic carcinoma, adenoid cystic carcinoma, mucoepidermoid carcinoma, epithelial myoepithelial carcinoma, and carcinoid tumor. <sup>‡</sup>Pneumothorax and/or prolonged air leak (n = 502), respiratory failure that required mechanical ventilation (n = 253), pneumonia (n = 231), pleural effusion (n = 150), others (atelectasis, bronchopleural fistula, pulmonary thromboembolism, etc.) (n = 291). Some patients had more than one complication
